# Supplementary material for: Development of valuable predictive read-across models based on “real-life” (sparse) nanotoxicity data
Source: Royal Society of Chemistry journal article supplement (doi:10.1039/c7en00102a), 2017-01-01
Supplement: c7en00102a1.xlsx [file c7en00102a1.xlsx]

## Sheet: Title
Development of valuable predictive read-across models based on “real-life” (sparse) nanotoxicity data
A. Gajewicz
a Laboratory of Environmental Chemometrics, Institute for Environmental and Human Health
Protection, Faculty of Chemistry, University of Gdańsk, Gdańsk, Poland
Supplementary material
*Corresponding author phone :phone: (+48 58) 523 52 46; fax: (+48 58) 523 50 12; e-mail: a.gajewicz@qsar.eu.org

## Sheet: CaseStudy1
	Splliting into: Training source compound (T) and Validation source compound (V)
	MeOx	Set	Exp log(LC50)-1
	TiO2	T	1.76
	Al2O3	V	1.85
	ZrO2	V	2.02
	Fe2O3	V	2.05
	SiO2	T	2.12
	Y2O3	V	2.21
	V2O3	T	2.24
	Cr2O3	V	2.3
	Sb2O3	V	2.31
	NiO	V	2.49
	Bi2O3	V	2.5
	WO3	T	2.56
	Mn2O3	T	2.64
	SnO2	V	2.67
	CoO	V	2.83
	La2O3	T	2.87
	In2O3	T	2.92
	ZnO	V	3.32
	Z-score standardization (TSourceCompound) and re-scaling (VSourceCompound)
	MeOx	χc	ΔHfc	Z.χc	Z.ΔHfc	Set
	TiO2	4.91	-1492	-0.254854	-1.95533	T
	SiO2	3.81	-618.3	-1.02441	-0.288092	T
	V2O3	3.24	-139.5	-1.42318	0.62558	T
	WO3	6.73	-715.4	1.01841	-0.473383	T
	Mn2O3	5	-96.3	-0.19189	0.708017	T
	La2O3	6.45	-157.7	0.822527	0.59085	T
	In2O3	6.78	-52.1	1.05339	0.792362	T
	Al2O3	3.44	-600	-1.28326	-0.253171	V
	ZrO2	4.95	-638.1	-0.22687	-0.325875	V
	Fe2O3	4.21	-378.5	-0.744572	0.169508	V
	Y2O3	3.35	-135.3	-1.34623	0.633595	V
	Cr2O3	4.36	-235.3	-0.639633	0.44277	V
	Sb2O3	4.46	-206.7	-0.569673	0.497346	V
	NiO	4.47	68	-0.562677	1.02154	V
	Bi2O3	5.34	-148.5	0.0459736	0.608406	V
	SnO2	4.57	-266.6	-0.492717	0.383041	V
	CoO	7.44	-786.8	1.51513	-0.609633	V
	ZnO	8.33	-449.4	2.13777	0.0342123	V
	mean	5.27429	-467.329
	std	1.42939	524.039
	Computation of independent variable (PC1SCORES)
			PC1SCORES = 0.707 Z.χc + 0.707 Z.ΔHfc
	MeOx	Z.χc	Z.ΔHfc	Set	PC1SCORES	Exp log(LC50)-1
	TiO2	-0.254854	-1.95533	T	-1.56284	1.76
	SiO2	-1.02441	-0.288092	T	-0.92808	2.12
	V2O3	-1.42318	0.62558	T	-0.56399	2.24
	WO3	1.01841	-0.473383	T	0.385395	2.56
	Mn2O3	-0.19189	0.708017	T	0.364957	2.64
	La2O3	0.822527	0.59085	T	0.999409	2.87
	In2O3	1.05339	0.792362	T	1.30515	2.92
	Al2O3	-1.28326	-0.253171	V	-1.08642	1.85
	ZrO2	-0.22687	-0.325875	V	-0.39085	2.02
	Fe2O3	-0.744572	0.169508	V	-0.406632	2.05
	Y2O3	-1.34623	0.633595	V	-0.503907	2.21
	Cr2O3	-0.639633	0.44277	V	-0.139203	2.3
	Sb2O3	-0.569673	0.497346	V	-0.0511429	2.31
	NiO	-0.562677	1.02154	V	0.324468	2.49
	Bi2O3	0.0459736	0.608406	V	0.462716	2.5
	SnO2	-0.492717	0.383041	V	-0.0775524	2.67
	CoO	1.51513	-0.609633	V	0.640283	2.83
	ZnO	2.13777	0.0342123	V	1.53582	3.32
	Predicting log(LC50)-1 with Nano-QRAPC approach
	MeOx	Set	PC1SCORES	Exp log(LC50)-1	Pred log(LC50)-1	m	Residuals
	TiO2	T	-1.56284	1.76	1.91079	0.329589	-0.150791
	Al2O3	V	-1.08642	1.85	2.0302		-0.180197
	SiO2	T	-0.92808	2.12	2.06504		0.0549647
	V2O3	T	-0.56399	2.24	2.26642		-0.0264203
	Y2O3	V	-0.503907	2.21	2.26587		-0.0558715
	Fe2O3	V	-0.406632	2.05	2.30776		-0.257757
	ZrO2	V	-0.39085	2.02	2.31455		-0.294553
	Cr2O3	V	-0.139203	2.3	2.42291		-0.122911
	SnO2	V	-0.0775524	2.67	2.44946		0.220542
	Sb2O3	V	-0.0511429	2.31	2.46083		-0.150829
	NiO	V	0.324468	2.49	2.62257		-0.132565
	Mn2O3	T	0.364957	2.64	2.55311		0.086889
	WO3	T	0.385395	2.56	2.64741		-0.0874093
	Bi2O3	V	0.462716	2.5	2.59904		-0.0990374
	CoO	V	0.640283	2.83	2.68869		0.141314
	La2O3	T	0.999409	2.87	2.80033		0.069669
	In2O3	T	1.30515	2.92	3.02436	0.504875	-0.10436
	ZnO	V	1.53582	3.32	2.95772	0.163539	0.362275
	Evaluating performance and uncertainty of Nano-QRAPC model
	MeOx	Set	PC1SCORES	Exp log(LC50)-1	Pred log(LC50)-1	m	Residuals	|Residuals|	Residuals2	yexp - yexpmean	(yexp - yexpmean)2	|res|/Exp
	TiO2	T	-1.56284	1.76	1.91079	0.329589	-0.150791	0.150791	0.0227379	-0.684286	0.468247	0.0856766
	SiO2	T	-0.92808	2.12	2.06504		0.0549647	0.0549647	0.00302112	-0.324286	0.105161	0.0259268
	V2O3	T	-0.56399	2.24	2.26642		-0.0264203	0.0264203	0.000698035	-0.204286	0.0417327	0.0117948
	Mn2O3	T	0.364957	2.64	2.55311		0.086889	0.086889	0.00754969	0.195714	0.0383041	0.0329125
	WO3	T	0.385395	2.56	2.64741		-0.0874093	0.0874093	0.00764038	0.115714	0.0133898	0.0341442
	La2O3	T	0.999409	2.87	2.80033		0.069669	0.069669	0.00485377	0.425714	0.181233	0.0242749
	In2O3	T	1.30515	2.92	3.02436	0.504875	-0.10436	0.10436	0.0108909	0.475714	0.226304	0.0357396
				R =	0.974895	RMSE =	0.0905474
				R2 =	0.946581	AAEP =	3.57813
						AAE =	0.082929
	MeOx	Set	PC1SCORES	Exp log(LC50)-1	Pred log(LC50)-1	m	Residuals	|Residuals|	Residuals2	yexp - yexpmean	(yexp - yexpmean)2	|res|/Exp	ypred - ypredmean	(ypred - ypredmean)2	(yexp - yexpmean)(ypred - ypredmean)
	Al2O3	V	-1.08642	1.85	2.0302		-0.180197	0.180197	0.0324709	-0.563636	0.317686	0.0974037	-0.435221	0.189417	0.245306
	Y2O3	V	-0.503907	2.21	2.26587		-0.0558715	0.0558715	0.00312163	-0.203636	0.0414678	0.0252812	-0.199546	0.0398185	0.0406348
	Fe2O3	V	-0.406632	2.05	2.30776		-0.257757	0.257757	0.0664389	-0.363636	0.132231	0.125735	-0.15766	0.0248567	0.0573309
	ZrO2	V	-0.39085	2.02	2.31455		-0.294553	0.294553	0.0867616	-0.393636	0.15495	0.145818	-0.150864	0.02276	0.0593856
	Cr2O3	V	-0.139203	2.3	2.42291		-0.122911	0.122911	0.0151071	-0.113636	0.0129132	0.0534396	-0.0425063	0.00180678	0.00483026
	SnO2	V	-0.0775524	2.67	2.44946		0.220542	0.220542	0.048639	0.256364	0.0657223	0.0826002	-0.0159598	0.000254715	-0.00409151
	Sb2O3	V	-0.0511429	2.31	2.46083		-0.150829	0.150829	0.0227495	-0.103636	0.0107405	0.0652941	-0.00458799	2.10496e-05	0.000475483
	NiO	V	0.324468	2.49	2.62257		-0.132565	0.132565	0.0175736	0.0763636	0.0058314	0.0532391	0.157148	0.0246955	0.0120004
	Bi2O3	V	0.462716	2.5	2.59904		-0.0990374	0.0990374	0.0098084	0.0863636	0.00745868	0.0396149	0.13362	0.0178543	0.0115399
	CoO	V	0.640283	2.83	2.68869		0.141314	0.141314	0.0199696	0.416364	0.173359	0.0499342	0.223269	0.049849	0.0929611
	ZnO	V	1.53582	3.32	2.95772	0.163539	0.362275	0.362275	0.131243	0.906364	0.821495	0.109119	0.492307	0.242367	0.446209
				R =	0.934342	RMSE =	0.203131
				R2 =	0.872994	AAEP =	7.70436
				Q2 =	0.739724	AAE =	0.183441
				CCC =	0.809856
	Testing the significance of the Nano-QRAPC predictions with the pairwise Student’s t test
	MeOx	Set	Exp log(LC50)-1	Pred log(LC50)-1	d	d2
	TiO2	T	1.76	1.91079	-0.150791	0.0227379
	Al2O3	V	1.85	2.0302	-0.180197	0.0324709
	ZrO2	V	2.02	2.31455	-0.294553	0.0867616
	Fe2O3	V	2.05	2.30776	-0.257757	0.0664389
	SiO2	T	2.12	2.06504	0.0549647	0.00302112
	Y2O3	V	2.21	2.26587	-0.0558715	0.00312163
	V2O3	T	2.24	2.26642	-0.0264203	0.000698035
	Cr2O3	V	2.3	2.42291	-0.122911	0.0151071
	Sb2O3	V	2.31	2.46083	-0.150829	0.0227495
	NiO	V	2.49	2.62257	-0.132565	0.0175736
	Bi2O3	V	2.5	2.59904	-0.0990374	0.0098084
	WO3	T	2.56	2.64741	-0.0874093	0.00764038
	Mn2O3	T	2.64	2.55311	0.086889	0.00754969
	SnO2	V	2.67	2.44946	0.220542	0.048639
	CoO	V	2.83	2.68869	0.141314	0.0199696
	La2O3	T	2.87	2.80033	0.069669	0.00485377
	In2O3	T	2.92	3.02436	-0.10436	0.0108909
	ZnO	V	3.32	2.95772	0.362275	0.131243
	If Student's t-value ≥	tcrit (α 0.05)	<=> p-value ≤ α => there would be no reason to reject the null hypothesis (accept H0)
	If Student's t-value ≤	tcrit (α 0.05)	<=> p-value ≥ α => there would be enough evidence to reject the null hypothesis and accept the alternative hypothesis in its place (accept HA)
	Sd	-0.727048
	(Sd)2	0.528599
	Sd2	0.511275
	N	18
	Sd/N	-0.0403916
	Sd2 - ((Sd)2/N)	0.481909
	var	0.0283476
	std	0.168367
	s	0.0396846
	t	-1.01782
	tcrit (α 0.05)	2.1098
	p-value	0.318475
	Since the calculated t-value is lower than the Student's t critical value, and the p-value is grater than the significance level of 5% (p ≥ 0.05), thus there is no reason to reject the null hypothesis. Therefore, one can conclude that there is no significant difference between the experimentally measured and predicted values of log(LC50)-1.
	Where:
	d	is the difference between log(LC50)-1 values for each xi, yi data pair
	d2	is the squares of the difference between log(LC50)-1 values
	Sd2	is the sum of all the squares of the difference between log(LC50)-1 values
	N	is the number of data pairs
	t	is the Student t-value
	tcrit (α 0.05)	is the Student's t critical value
	Aplicabilty domain of the Nano-QRAPC model verification with the laverage approach
	MeOx	PC1SCORES	Exp log(LC50)-1	Pred log(LC50)-1	Lev	Residuals	Z.Residuals	Set
	Al2O3	-1.08642	1.85	2.0302	0.323075	-0.180197	0.0597045	V
	Bi2O3	0.462716	2.5	2.59904	0.174671	-0.0990374	0.140864	V
	CoO	0.640283	2.83	2.68869	0.204549	0.141314	0.381215	V
	Cr2O3	-0.139203	2.3	2.42291	0.145883	-0.122911	0.11699	V
	Fe2O3	-0.406632	2.05	2.30776	0.168466	-0.257757	-0.0178561	V
	In2O3	1.30515	2.92	3.02436	0.401917	-0.10436	0.135542	T
	La2O3	0.999409	2.87	2.80033	0.293714	0.069669	0.30957	T
	Mn2O3	0.364957	2.64	2.55311	0.162309	0.086889	0.32679	T
	NiO	0.324468	2.49	2.62257	0.158211	-0.132565	0.107336	V
	Sb2O3	-0.0511429	2.31	2.46083	0.143257	-0.150829	0.089072	V
	SiO2	-0.92808	2.12	2.06504	0.274109	0.0549647	0.294866	T
	SnO2	-0.0775524	2.67	2.44946	0.14386	0.220542	0.460444	V
	TiO2	-1.56284	1.76	1.91079	0.511708	-0.150791	0.0891105	T
	V2O3	-0.56399	2.24	2.26642	0.190544	-0.0264203	0.213481	T
	WO3	0.385395	2.56	2.64741	0.1657	-0.0874093	0.152492	T
	Y2O3	-0.503907	2.21	2.26587	0.180896	-0.0558715	0.18403	V
	ZnO	1.53582	3.32	2.95772	0.500988	0.362275	0.602177	V
	ZrO2	-0.39085	2.02	2.31455	0.166037	-0.294553	-0.0546519	V
	Aplicabilty domain of the Nano-QRAPC model verification using standardization approach
	MeOx	χc	ΔHfc	S.χc	S.ΔHfc	MEANSk	SDSk	Snew	Set	Status
	TiO2	4.91	-1492	0.254854	1.95533	1.10509	1.20242	2.64419	T	not an X-outlier
	SiO2	3.81	-618.3	1.02441	0.288092	0.656252	0.520657	1.32269	T	not an X-outlier
	V2O3	3.24	-139.5	1.42318	0.62558	1.02438	0.56399	1.74629	T	not an X-outlier
	WO3	6.73	-715.4	1.01841	0.473383	0.745899	0.385395	1.23921	T	not an X-outlier
	Mn2O3	5	-96.3	0.19189	0.708017	0.449953	0.364957	0.917098	T	not an X-outlier
	La2O3	6.45	-157.7	0.822527	0.59085	0.706689	0.163821	0.916379	T	not an X-outlier
	In2O3	6.78	-52.1	1.05339	0.792362	0.922878	0.184578	1.15914	T	not an X-outlier
	Al2O3	3.44	-600	1.28326	0.253171	0.768217	0.728385	1.70055	V	within AD
	ZrO2	4.95	-638.1	0.22687	0.325875	0.276373	0.0700076	0.365982	V	within AD
	Fe2O3	4.21	-378.5	0.744572	0.169508	0.45704	0.406632	0.977529	V	within AD
	Y2O3	3.35	-135.3	1.34623	0.633595	0.989911	0.503907	1.63491	V	within AD
	Cr2O3	4.36	-235.3	0.639633	0.44277	0.541201	0.139203	0.719381	V	within AD
	Sb2O3	4.46	-206.7	0.569673	0.497346	0.533509	0.0511429	0.598972	V	within AD
	NiO	4.47	68	0.562677	1.02154	0.79211	0.324468	1.20743	V	within AD
	Bi2O3	5.34	-148.5	0.0459736	0.608406	0.32719	0.3977	0.836246	V	within AD
	SnO2	4.57	-266.6	0.492717	0.383041	0.437879	0.0775524	0.537146	V	within AD
	CoO	7.44	-786.8	1.51513	0.609633	1.06238	0.640283	1.88194	V	within AD
	ZnO	8.33	-449.4	2.13777	0.0342123	1.08599	1.48744	2.98992	V	within AD
	MEANT	5.27429	-467.329
	SDT	1.42939	524.039

## Sheet: CaseStudy2
	Splliting into: Training source compound (T) and Validation source compound (V)
	MeOx	Set	Exp log(EC50)-1
	TiO2	T	1.74
	SnO2	T	2.01
	ZrO2	V	2.15
	SiO2	V	2.2
	Fe2O3	T	2.29
	Al2O3	V	2.49
	Cr2O3	V	2.51
	Sb2O3	T	2.64
	In2O3	V	2.81
	Bi2O3	V	2.82
	La2O3	T	2.87
	Y2O3	V	2.87
	V2O3	V	3.14
	CuO	T	3.2
	NiO	V	3.45
	ZnO	V	3.45
	CoO	T	3.51
	Z-score standardization (TSourceCompound) and re-scaling (VSourceCompound)
	MeOx	ΔHMe+	Me+	Z.ΔHMe+	Z.Me+	Set
	TiO2	1575.73	4	0.93049	1.22474	T
	SnO2	1717.32	4	1.26337	1.22474	T
	Fe2O3	1408.29	3	0.536831	0	T
	Sb2O3	1233.06	3	0.124857	0	T
	La2O3	1017.22	3	-0.382592	0	T
	CuO	706.25	2	-1.1137	-1.22474	T
	CoO	601.8	2	-1.35926	-1.22474	T
	ZrO2	1357.66	4	0.417798	1.22474	V
	SiO2	1686.38	4	1.19063	1.22474	V
	Al2O3	1187.83	3	0.0185195	0	V
	Cr2O3	1268.7	3	0.208649	0	V
	In2O3	1271.13	3	0.214362	0	V
	Bi2O3	1137.4	3	-0.100044	0	V
	Y2O3	837.15	3	-0.805945	0	V
	V2O3	1097.73	3	-0.19331	0	V
	NiO	596.7	2	-1.37125	-1.22474	V
	ZnO	662.44	2	-1.2167	-1.22474	V
	mean	1179.95	3
	std	425.343	0.816497
	Computation of independent variable (PC1SCORES)
			PC1SCORES = 0.707 Z.ΔHMe+ + 0.707 Z.Me+
	MeOx	Z.ΔHMe+	Z.Me+	Set	PC1SCORES	Exp log(EC50)-1
	TiO2	0.93049	1.22474	T	1.52398	1.74
	SnO2	1.26337	1.22474	T	1.75937	2.01
	Fe2O3	0.536831	0	T	0.379597	2.29
	Sb2O3	0.124857	0	T	0.0882875	2.64
	La2O3	-0.382592	0	T	-0.270534	2.87
	CuO	-1.1137	-1.22474	T	-1.65353	3.2
	CoO	-1.35926	-1.22474	T	-1.82717	3.51
	ZrO2	0.417798	1.22474	V	1.16145	2.15
	SiO2	1.19063	1.22474	V	1.70793	2.2
	Al2O3	0.0185195	0	V	0.0130953	2.49
	Cr2O3	0.208649	0	V	0.147537	2.51
	In2O3	0.214362	0	V	0.151577	2.81
	Bi2O3	-0.100044	0	V	-0.0707416	2.82
	Y2O3	-0.805945	0	V	-0.569889	2.87
	V2O3	-0.19331	0	V	-0.136691	3.14
	NiO	-1.37125	-1.22474	V	-1.83565	3.45
	ZnO	-1.2167	-1.22474	V	-1.72636	3.45
	Predicting log(EC50)-1 with Nano-QRAPC approach
	MeOx	Set	PC1SCORES	Exp log(EC50)-1	Pred log(EC50)-1	m	Residuals
	NiO	V	-1.83565	3.45	3.52514	-1.78528	-0.0751364
	CoO	T	-1.82717	3.51	3.24143	-0.238613	0.268567
	ZnO	V	-1.72636	3.45	3.33002		0.119975
	CuO	T	-1.65353	3.2	3.43861		-0.238608
	Y2O3	V	-0.569889	2.87	2.94143		-0.07143
	La2O3	T	-0.270534	2.87	2.75536		0.114638
	V2O3	V	-0.136691	3.14	2.78421		0.355792
	Bi2O3	V	-0.0707416	2.82	2.74194		0.0780643
	Al2O3	V	0.0130953	2.49	2.6882		-0.198197
	Sb2O3	T	0.0882875	2.64	2.54989		0.0901146
	Cr2O3	V	0.147537	2.51	2.56881		-0.0588136
	In2O3	V	0.151577	2.81	2.56396		0.24604
	Fe2O3	T	0.379597	2.29	2.45739		-0.167386
	ZrO2	V	1.16145	2.15	1.91423		0.235766
	TiO2	T	1.52398	1.74	2.05777		-0.317767
	SiO2	V	1.70793	2.2	1.951		0.249
	SnO2	T	1.75937	2.01	1.62687	-0.480608	0.383128
	Evaluating performance and uncertainty of Nano-QRAPC model
	MeOx	Set	PC1SCORES	Exp log(EC50)-1	Pred log(EC50)-1	m	Residuals	|Residuals|	Residuals2	yexp - yexpmean	(yexp - yexpmean)2	|res|/Exp
	CoO	T	-1.82717	3.51	3.24143	-0.238613	0.268567	0.268567	0.0721282	0.901429	0.812573	0.0765148
	CuO	T	-1.65353	3.2	3.43861		-0.238608	0.238608	0.056934	0.591429	0.349788	0.0745651
	La2O3	T	-0.270534	2.87	2.75536		0.114638	0.114638	0.0131418	0.261429	0.0683449	0.0399435
	Sb2O3	T	0.0882875	2.64	2.54989		0.0901146	0.0901146	0.00812063	0.0314286	0.000987755	0.0341343
	Fe2O3	T	0.379597	2.29	2.45739		-0.167386	0.167386	0.0280179	-0.318571	0.101488	0.0730941
	TiO2	T	1.52398	1.74	2.05777		-0.317767	0.317767	0.100976	-0.868571	0.754416	0.182625
	SnO2	T	1.75937	2.01	1.62687	-0.480608	0.383128	0.383128	0.146787	-0.598571	0.358288	0.190611
				R =	0.91266	RMSE =	0.246723
				R2 =	0.825787	AAEP =	9.59268
						AAE =	0.225744
	MeOx	Set	PC1SCORES	Exp log(EC50)-1	Pred log(EC50)-1	m	Residuals	|Residuals|	Residuals2	yexp - yexpmean	(yexp - yexpmean)2	|res|/Exp	ypred - ypredmean	(ypred - ypredmean)2	(yexp - yexpmean)(ypred - ypredmean)
	NiO	V	-1.83565	3.45	3.52514	-1.78528	-0.0751364	0.0751364	0.00564548	0.661	0.436921	0.0217787	0.824242	0.679376	0.544824
	ZnO	V	-1.72636	3.45	3.33002		0.119975	0.119975	0.014394	0.661	0.436921	0.0347754	0.629131	0.395806	0.415856
	Y2O3	V	-0.569889	2.87	2.94143		-0.07143	0.07143	0.00510225	0.081	0.006561	0.0248885	0.240536	0.0578576	0.0194834
	V2O3	V	-0.136691	3.14	2.78421		0.355792	0.355792	0.126588	0.351	0.123201	0.113309	0.0833142	0.00694126	0.0292433
	Bi2O3	V	-0.0707416	2.82	2.74194		0.0780643	0.0780643	0.00609404	0.031	0.000961	0.0276824	0.0410417	0.00168442	0.00127229
	Al2O3	V	0.0130953	2.49	2.6882		-0.198197	0.198197	0.0392822	-0.299	0.089401	0.0795973	-0.0126967	0.000161207	0.00379632
	Cr2O3	V	0.147537	2.51	2.56881		-0.0588136	0.0588136	0.00345903	-0.279	0.077841	0.0234317	-0.13208	0.0174452	0.0368504
	In2O3	V	0.151577	2.81	2.56396		0.24604	0.24604	0.0605357	0.021	0.000441	0.0875587	-0.136934	0.0187509	-0.00287562
	ZrO2	V	1.16145	2.15	1.91423		0.235766	0.235766	0.0555856	-0.639	0.408321	0.109659	-0.78666	0.618834	0.502676
	SiO2	V	1.70793	2.2	1.951		0.249	0.249	0.062001	-0.589	0.346921	0.113182	-0.749894	0.562341	0.441688
				R =	0.93452	RMSE =	0.185543
				R2 =	0.873327	AAEP =	6.35863
				Q2 =	0.803534	AAE =	0.168821
				CCC =	0.913231
	Testing the significance of the Nano-QRAPC predictions with the pairwise Student’s t test
	MeOx	Set	Exp log(EC50)-1	Pred log(EC50)-1	d	d2
	TiO2	T	1.74	2.05777	-0.317767	0.100976
	SnO2	T	2.01	1.62687	0.383128	0.146787
	ZrO2	V	2.15	1.91423	0.235766	0.0555856
	SiO2	V	2.2	1.951	0.249	0.062001
	Fe2O3	T	2.29	2.45739	-0.167386	0.0280179
	Al2O3	V	2.49	2.6882	-0.198197	0.0392822
	Cr2O3	V	2.51	2.56881	-0.0588136	0.00345903
	Sb2O3	T	2.64	2.54989	0.0901146	0.00812063
	In2O3	V	2.81	2.56396	0.24604	0.0605357
	Bi2O3	V	2.82	2.74194	0.0780643	0.00609404
	Y2O3	V	2.87	2.94143	-0.07143	0.00510225
	La2O3	T	2.87	2.75536	0.114638	0.0131418
	V2O3	V	3.14	2.78421	0.355792	0.126588
	CuO	T	3.2	3.43861	-0.238608	0.056934
	NiO	V	3.45	3.52514	-0.0751364	0.00564548
	ZnO	V	3.45	3.33002	0.119975	0.014394
	CoO	T	3.51	3.24143	0.268567	0.0721282
	If Student's t-value ≥	tcrit (α 0.05)	<=> p-value ≤ α => there would be no reason to reject the null hypothesis (accept H0)
	If Student's t-value ≤	tcrit (α 0.05)	<=> p-value ≥ α => there would be enough evidence to reject the null hypothesis and accept the alternative hypothesis in its place (accept HA)
	Sd	1.01375
	(Sd)2	1.02768
	Sd2	0.804793
	N	17
	Sd/N	0.0596321
	Sd2 - ((Sd)2/N)	0.744341
	var	0.0465213
	std	0.215688
	s	0.052312
	t	1.13993
	tcrit (α 0.05)	2.1199
	p-value	0.275869
	Since the calculated t-value is lower than the Student's t critical value, and the p-value is grater than the significance level of 5% (p ≥ 0.05), thus there is no reason to reject the null hypothesis. Therefore, one can conclude that there is no significant difference between the experimentally measured and predicted values of log(EC50)-1.
	Where:
	d	is the difference between log(EC50)-1 values for each xi, yi data pair
	d2	is the squares of the difference between log(EC50)-1 values
	Sd2	is the sum of all the squares of the difference between log(EC50)-1 values
	N	is the number of data pairs
	t	is the Student t-value
	tcrit (α 0.05)	is the Student's t critical value
	Aplicabilty domain of the Nano-QRAPC model verification with the laverage approach
	MeOx	PC1SCORES	Exp log(EC50)-1	Pred log(EC50)-1	Lev	Residuals	Z.Residuals	Set
	Al2O3	0.0130953	2.49	2.6882	0.142866	-0.198197	-0.474671	V
	Bi2O3	-0.0707416	2.82	2.74194	0.143276	0.0780643	-0.19841	V
	CoO	-1.82717	3.51	3.24143	0.428971	0.268567	-0.00790711	T
	Cr2O3	0.147537	2.51	2.56881	0.144779	-0.0588136	-0.335288	V
	CuO	-1.65353	3.2	3.43861	0.375454	-0.238608	-0.515082	T
	Fe2O3	0.379597	2.29	2.45739	0.155194	-0.167386	-0.443859	T
	In2O3	0.151577	2.81	2.56396	0.144779	0.24604	-0.0304339	V
	La2O3	-0.270534	2.87	2.75536	0.149085	0.114638	-0.161836	T
	NiO	-1.83565	3.45	3.52514	0.432106	-0.0751364	-0.35161	V
	Sb2O3	0.0882875	2.64	2.54989	0.143549	0.0901146	-0.186359	T
	SiO2	1.70793	2.2	1.951	0.392678	0.249	-0.027474	V
	SnO2	1.75937	2.01	1.62687	0.407501	0.383128	0.106654	T
	TiO2	1.52398	1.74	2.05777	0.340246	-0.317767	-0.594241	T
	V2O3	-0.136691	3.14	2.78421	0.144532	0.355792	0.0793178	V
	Y2O3	-0.569889	2.87	2.94143	0.170615	-0.07143	-0.347904	V
	ZnO	-1.72636	3.45	3.33002	0.398556	0.119975	-0.156499	V
	ZrO2	1.16145	2.15	1.91423	0.257819	0.235766	-0.0407079	V
	Aplicabilty domain of the Nano-QRAPC model verification using standardization approach
	MeOx	ΔHMe+	Me+	S.ΔHMe+	S.Me+	MEANSk	SDSk	Snew	Set	Status
	TiO2	1575.73	4	0.93049	1.22474	1.07762	0.20807	1.34395	T	not an X-outlier
	SnO2	1717.32	4	1.26337	1.22474	1.24406	0.0273154	1.27902	T	not an X-outlier
	Fe2O3	1408.29	3	0.536831	0	0.268416	0.379597	0.754299	T	not an X-outlier
	Sb2O3	1233.06	3	0.124857	0	0.0624287	0.0882875	0.175437	T	not an X-outlier
	La2O3	1017.22	3	0.382592	0	0.191296	0.270534	0.537579	T	not an X-outlier
	CuO	706.25	2	1.1137	1.22474	1.16922	0.0785227	1.26973	T	not an X-outlier
	CoO	601.8	2	1.35926	1.22474	1.292	0.0951192	1.41376	T	not an X-outlier
	ZrO2	1357.66	4	0.417798	1.22474	0.821271	0.570598	1.55164	V	within AD
	SiO2	1686.38	4	1.19063	1.22474	1.20769	0.0241205	1.23856	V	within AD
	Al2O3	1187.83	3	0.0185195	0	0.00925976	0.0130953	0.0260217	V	within AD
	Cr2O3	1268.7	3	0.208649	0	0.104324	0.147537	0.293171	V	within AD
	In2O3	1271.13	3	0.214362	0	0.107181	0.151577	0.301199	V	within AD
	Bi2O3	1137.4	3	0.100044	0	0.0500219	0.0707416	0.140571	V	within AD
	Y2O3	837.15	3	0.805945	0	0.402973	0.569889	1.13243	V	within AD
	V2O3	1097.73	3	0.19331	0	0.0966548	0.136691	0.271619	V	within AD
	NiO	596.7	2	1.37125	1.22474	1.298	0.103598	1.4306	V	within AD
	ZnO	662.44	2	1.2167	1.22474	1.22072	0.00569119	1.22801	V	within AD
	MEANT	1179.95	3
	SDT	425.343	0.816497

## Sheet: CaseStudy3
	Splliting into: Training source compound (T) and Validation source compound (V)
	MeOx	Set	Exp log(LC50)-1
	Cr2O3	T	2.06
	TiO2	T	2.14
	Fe2O3	V	2.4
	Al2O3	V	2.42
	SnO2	T	2.53
	SiO2	V	2.54
	ZrO2	T	2.58
	In2O3	T	2.83
	Sb2O3	V	3.12
	V2O3	V	3.48
	Bi2O3	V	3.55
	NiO	T	3.79
	CuO	T	4.24
	La2O3	T	4.96
	Y2O3	V	5.79
	ZnO	T	5.8
	Z-score standardization (TSourceCompound) and re-scaling (VSourceCompound)
	MeOx	LZELEHHO	ΔHMe+	Z.LZELEHHO	Z.ΔHMe+	Set
	Cr2O3	0.1985	1268.7	0.600755	0.339323	T
	TiO2	0.19486	1575.73	0.489897	1.09236	T
	SnO2	0.22422	1717.32	1.38408	1.43963	T
	ZrO2	0.18424	1357.66	0.166457	0.55751	T
	In2O3	0.196	1271.13	0.524616	0.345283	T
	NiO	0.18042	596.7	0.0501165	-1.30885	T
	CuO	0.17822	706.25	-0.016886	-1.04017	T
	La2O3	0.12053	1017.22	-1.77387	-0.277467	T
	ZnO	0.13198	662.44	-1.42516	-1.14762	T
	Fe2O3	0.17472	1408.29	-0.123481	0.681687	V
	Al2O3	0.21053	1187.83	0.967137	0.140978	V
	SiO2	0.24497	1686.38	2.01603	1.36374	V
	Sb2O3	0.17398	1233.06	-0.146018	0.251911	V
	V2O3	0.17387	1097.73	-0.149368	-0.0800052	V
	Bi2O3	0.18445	1137.4	0.172853	0.0172911	V
	Y2O3	0.12854	837.15	-1.52992	-0.719115	V
	mean	0.178774	1130.35
	std	0.0328346	407.724
	Computation of independent variable (PC1SCORES)
			PC1SCORES = 0.707 Z.LZELEHHO + 0.707 Z.ΔHMe+
	MeOx	Z.LZELEHHO	Z.ΔHMe+	Set	PC1SCORES	Exp log(LC50)-1
	Cr2O3	0.600755	0.339323	T	0.664736	2.06
	TiO2	0.489897	1.09236	T	1.11882	2.14
	SnO2	1.38408	1.43963	T	1.99666	2.53
	ZrO2	0.166457	0.55751	T	0.511922	2.58
	In2O3	0.524616	0.345283	T	0.615112	2.83
	NiO	0.0501165	-1.30885	T	-0.890061	3.79
	CuO	-0.016886	-1.04017	T	-0.747448	4.24
	La2O3	-1.77387	-0.277467	T	-1.45052	4.96
	ZnO	-1.42516	-1.14762	T	-1.81923	5.8
	Fe2O3	-0.123481	0.681687	V	0.394712	2.4
	Al2O3	0.967137	0.140978	V	0.783556	2.42
	SiO2	2.01603	1.36374	V	2.38986	2.54
	Sb2O3	-0.146018	0.251911	V	0.0748775	3.12
	V2O3	-0.149368	-0.0800052	V	-0.162191	3.48
	Bi2O3	0.172853	0.0172911	V	0.134452	3.55
	Y2O3	-1.52992	-0.719115	V	-1.59031	5.79
	Predicting log(LC50)-1 with Nano-QRAPC approach
	MeOx	Set	PC1SCORES	Exp log(LC50)-1	Pred log(LC50)-1	m	Residuals
	ZnO	T	-1.81923	5.8	5.72971	-2.08758	0.0702933
	Y2O3	V	-1.59031	5.79	5.27848		0.511519
	La2O3	T	-1.45052	4.96	5.0024		-0.0423998
	NiO	T	-0.890061	3.79	4.38605		-0.596047
	CuO	T	-0.747448	4.24	3.66692		0.573084
	V2O3	V	-0.162191	3.48	3.46856		0.011438
	Sb2O3	V	0.0748775	3.12	3.15608		-0.0360768
	Bi2O3	V	0.134452	3.55	3.07755		0.47245
	Fe2O3	V	0.394712	2.4	2.7345		-0.334498
	ZrO2	T	0.511922	2.58	2.93678		-0.356782
	In2O3	T	0.615112	2.83	2.22886		0.601137
	Cr2O3	T	0.664736	2.06	2.76202		-0.702023
	Al2O3	V	0.783556	2.42	2.08093		0.339067
	TiO2	T	1.11882	2.14	2.22024		-0.0802351
	SnO2	T	1.99666	2.53	2.29466	0.176178	0.235345
	SiO2	V	2.38986	2.54	2.70469	0.444274	-0.164689
	Evaluating performance and uncertainty of Nano-QRAPC model
	MeOx	Set	PC1SCORES	Exp log(LC50)-1	Pred log(LC50)-1	m	Residuals	|Residuals|	Residuals2	yexp - yexpmean	(yexp - yexpmean)2	|res|/Exp
	ZnO	T	-1.81923	5.8	5.72971	-2.08758	0.0702933	0.0702933	0.00494115	2.36333	5.58534	0.0121195
	La2O3	T	-1.45052	4.96	5.0024		-0.0423998	0.0423998	0.00179774	1.52333	2.32054	0.00854834
	NiO	T	-0.890061	3.79	4.38605		-0.596047	0.596047	0.355272	0.353333	0.124844	0.157268
	CuO	T	-0.747448	4.24	3.66692		0.573084	0.573084	0.328425	0.803333	0.645344	0.135161
	ZrO2	T	0.511922	2.58	2.93678		-0.356782	0.356782	0.127293	-0.856667	0.733878	0.138288
	In2O3	T	0.615112	2.83	2.22886		0.601137	0.601137	0.361365	-0.606667	0.368044	0.212416
	Cr2O3	T	0.664736	2.06	2.76202		-0.702023	0.702023	0.492836	-1.37667	1.89521	0.340788
	TiO2	T	1.11882	2.14	2.22024		-0.0802351	0.0802351	0.00643767	-1.29667	1.68134	0.037493
	SnO2	T	1.99666	2.53	2.29466	0.176178	0.235345	0.235345	0.0553872	-0.906667	0.822044	0.0930216
				R =	0.938141	RMSE =	0.438907
				R2 =	0.877703	AAEP =	12.6123
						AAE =	0.361927
	MeOx	Set	PC1SCORES	Exp log(LC50)-1	Pred log(LC50)-1	m	Residuals	|Residuals|	Residuals2	yexp - yexpmean	(yexp - yexpmean)2	|res|/Exp	ypred - ypredmean	(ypred - ypredmean)2	(yexp - yexpmean)(ypred - ypredmean)
	Y2O3	V	-1.59031	5.79	5.27848		0.511519	0.511519	0.261652	2.46143	6.05863	0.0883453	2.06408	4.26044	5.08059
	V2O3	V	-0.162191	3.48	3.46856		0.011438	0.011438	0.000130829	0.151429	0.0229306	0.00328679	0.254163	0.064599	0.0384876
	Sb2O3	V	0.0748775	3.12	3.15608		-0.0360768	0.0360768	0.00130154	-0.208571	0.043502	0.0115631	-0.0583217	0.00340142	0.0121642
	Bi2O3	V	0.134452	3.55	3.07755		0.47245	0.47245	0.223209	0.221429	0.0490306	0.133084	-0.136848	0.0187274	-0.0303021
	Fe2O3	V	0.394712	2.4	2.7345		-0.334498	0.334498	0.111889	-0.928571	0.862245	0.139374	-0.479901	0.230305	0.445622
	Al2O3	V	0.783556	2.42	2.08093		0.339067	0.339067	0.114966	-0.908571	0.825502	0.14011	-1.13347	1.28474	1.02983
	SiO2	V	2.38986	2.54	2.70469	0.444274	-0.164689	0.164689	0.0271225	-0.788571	0.621845	0.0648382	-0.509709	0.259804	0.401942
				R =	0.968306	RMSE =	0.325197
				R2 =	0.937616	AAEP =	8.29431
				Q2 =	0.912742	AAE =	0.267105
				CCC =	0.949631
	Testing the significance of the Nano-QRAPC predictions with the pairwise Student’s t test
	MeOx	Set	Exp log(LC50)-1	Pred log(LC50)-1	d	d2
	Cr2O3	T	2.06	2.76202	-0.702023	0.492836
	TiO2	T	2.14	2.22024	-0.0802351	0.00643767
	Fe2O3	V	2.4	2.7345	-0.334498	0.111889
	Al2O3	V	2.42	2.08093	0.339067	0.114966
	SnO2	T	2.53	2.29466	0.235345	0.0553872
	SiO2	V	2.54	2.70469	-0.164689	0.0271225
	ZrO2	T	2.58	2.93678	-0.356782	0.127293
	In2O3	T	2.83	2.22886	0.601137	0.361365
	Sb2O3	V	3.12	3.15608	-0.0360768	0.00130154
	V2O3	V	3.48	3.46856	0.011438	0.000130829
	Bi2O3	V	3.55	3.07755	0.47245	0.223209
	NiO	T	3.79	4.38605	-0.596047	0.355272
	CuO	T	4.24	3.66692	0.573084	0.328425
	La2O3	T	4.96	5.0024	-0.0423998	0.00179774
	Y2O3	V	5.79	5.27848	0.511519	0.261652
	ZnO	T	5.8	5.72971	0.0702933	0.00494115
	If Student's t-value ≥	tcrit (α 0.05)	<=> p-value ≤ α => there would be no reason to reject the null hypothesis (accept H0)
	If Student's t-value ≤	tcrit (α 0.05)	<=> p-value ≥ α => there would be enough evidence to reject the null hypothesis and accept the alternative hypothesis in its place (accept HA)
	Sd	0.501582
	(Sd)2	0.251584
	Sd2	2.47403
	N	16
	Sd/N	0.0313488
	Sd2 - ((Sd)2/N)	2.4583
	var	0.163887
	std	0.404829
	s	0.101207
	t	0.309749
	tcrit (α 0.05)	2.1315
	p-value	0.761454
	Since the calculated t-value is lower than the Student's t critical value, and the p-value is grater than the significance level of 5% (p ≥ 0.05), thus there is no reason to reject the null hypothesis. Therefore, one can conclude that there is no significant difference between the experimentally measured and predicted values of log(LC50)-1.
	Where:
	d	is the difference between log(LC50)-1 values for each xi, yi data pair
	d2	is the squares of the difference between log(LC50)-1 values
	Sd2	is the sum of all the squares of the difference between log(LC50)-1 values
	N	is the number of data pairs
	t	is the Student t-value
	tcrit (α 0.05)	is the Student's t critical value
	Aplicabilty domain of the Nano-QRAPC model verification with the laverage approach
	MeOx	PC1SCORES	Exp log(LC50)-1	Pred log(LC50)-1	Lev	Residuals	Z.Residuals	Set
	Al2O3	0.783556	2.42	2.08093	0.15754	0.339067	0.760117	V
	Bi2O3	0.134452	3.55	3.07755	0.112401	0.47245	1.0896	V
	Cr2O3	0.664736	2.06	2.76202	0.144353	-0.702023	-1.81156	T
	CuO	-0.747448	4.24	3.66692	0.154037	0.573084	1.33818	T
	Fe2O3	0.394712	2.4	2.7345	0.122718	-0.334498	-0.903705	V
	In2O3	0.615112	2.83	2.22886	0.140446	0.601137	1.40748	T
	La2O3	-1.45052	4.96	5.0024	0.271558	-0.0423998	-0.182172	T
	NiO	-0.890061	3.79	4.38605	0.171558	-0.596047	-1.54978	T
	Sb2O3	0.0748775	3.12	3.15608	0.111485	-0.0360768	-0.166553	V
	SiO2	2.38986	2.54	2.70469	0.547016	-0.164689	-0.484249	V
	SnO2	1.99666	2.53	2.29466	0.416361	0.235345	0.503906	T
	TiO2	1.11882	2.14	2.22024	0.206838	-0.0802351	-0.275632	T
	V2O3	-0.162191	3.48	3.46856	0.113065	0.011438	-0.0491832	V
	Y2O3	-1.59031	5.79	5.27848	0.304037	0.511519	1.18611	V
	ZnO	-1.81923	5.8	5.72971	0.363889	0.0702933	0.0961997	T
	ZrO2	0.511922	2.58	2.93678	0.13096	-0.356782	-0.958752	T
	Aplicabilty domain of the Nano-QRAPC model verification using standardization approach
	MeOx	LZELEHHO	ΔHMe+	S.LZELEHHO	S.ΔHMe+	MEANSk	SDSk	Snew	Set	Status
	Cr2O3	0.1985	1268.7	0.600755	0.339323	0.470039	0.184861	0.706661	T	not an X-outlier
	TiO2	0.19486	1575.73	0.489897	1.09236	0.791127	0.426004	1.33641	T	not an X-outlier
	SnO2	0.22422	1717.32	1.38408	1.43963	1.41185	0.0392811	1.46213	T	not an X-outlier
	ZrO2	0.18424	1357.66	0.166457	0.55751	0.361984	0.276516	0.715924	T	not an X-outlier
	In2O3	0.196	1271.13	0.524616	0.345283	0.43495	0.126808	0.597263	T	not an X-outlier
	NiO	0.18042	596.7	0.0501165	1.30885	0.679485	0.890061	1.81876	T	not an X-outlier
	CuO	0.17822	706.25	0.016886	1.04017	0.528526	0.723568	1.45469	T	not an X-outlier
	La2O3	0.12053	1017.22	1.77387	0.277467	1.02567	1.05812	2.38006	T	not an X-outlier
	ZnO	0.13198	662.44	1.42516	1.14762	1.28639	0.196251	1.53759	T	not an X-outlier
	Fe2O3	0.17472	1408.29	0.123481	0.681687	0.402584	0.394712	0.907815	V	within AD
	Al2O3	0.21053	1187.83	0.967137	0.140978	0.554058	0.584183	1.30181	V	within AD
	SiO2	0.24497	1686.38	2.01603	1.36374	1.68989	0.461237	2.28027	V	within AD
	Sb2O3	0.17398	1233.06	0.146018	0.251911	0.198964	0.0748775	0.294808	V	within AD
	V2O3	0.17387	1097.73	0.149368	0.0800052	0.114687	0.0490471	0.177467	V	within AD
	Bi2O3	0.18445	1137.4	0.172853	0.0172911	0.095072	0.109999	0.23587	V	within AD
	Y2O3	0.12854	837.15	1.52992	0.719115	1.12452	0.573329	1.85838	V	within AD
	MEANT	0.178774	1130.35
	SDT	0.0328346	407.724
